# Supplementary material for: Revertant mosaicism for family mutations is not observed in BRCA1/2 phenocopies
Source: PLOS journal article supplement (doi:10.1371/journal.pone.0171663), 2017-02-15
Supplement: S2 (10.1371/journal.pone.0171663.s002) [file journal.pone.0171663.s002]

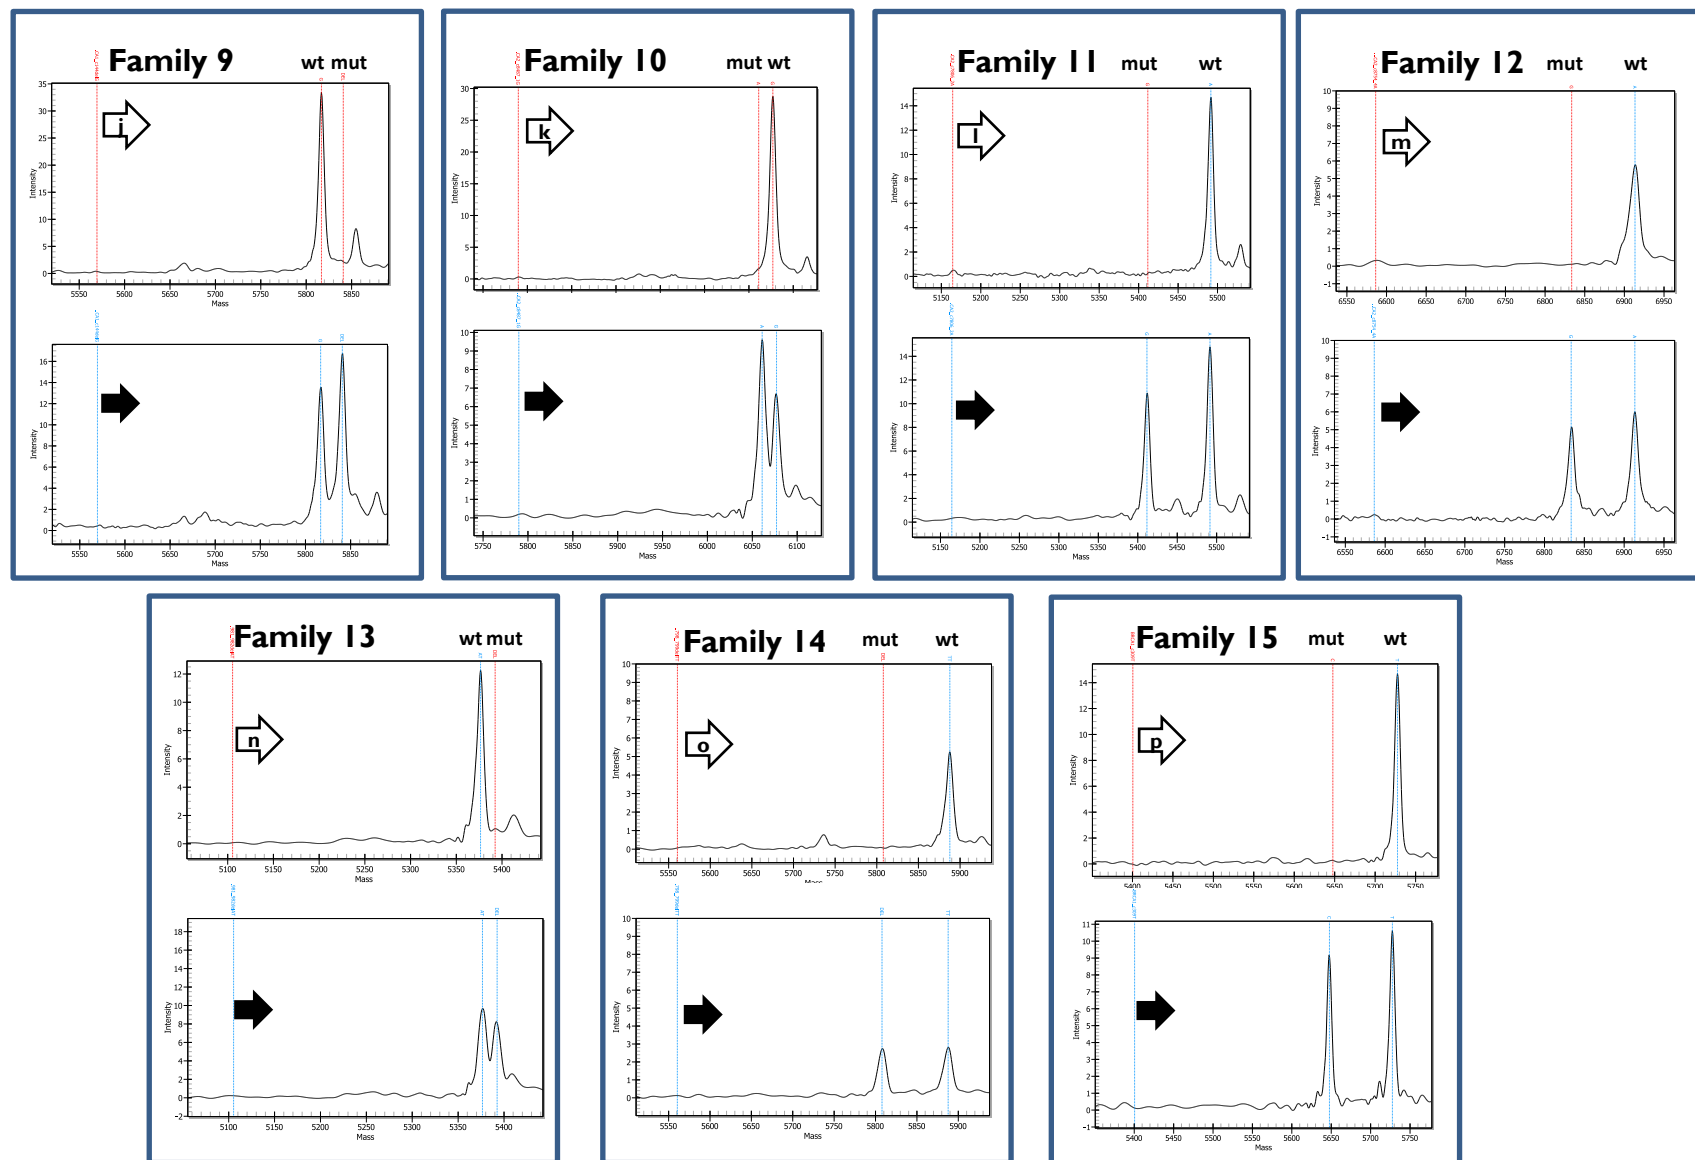

**Supplementary Figure 2.** Mass spectra of phenocopies (white arrows) and mutation carriers (black arrows) from families 9-15. Mutant (mut) and *wild type* (wt) alleles are discriminated by the difference in size. The analysis was carried out on DNA extracted from peripheral blood leukocytes in all the patients.
